# Supplementary material
Source: PubMed Central journal article supplement (PMC3983921)
Supplement: NIHMS564888-supplement-combined_Supplement.pdf [file NIHMS564888-supplement-combined_Supplement.pdf]

## Supplementary Figure S1

### *E. coli* “late” Acylations of lipid A precursor (Kdo<sub>2</sub>-lipid IV<sub>A</sub>)

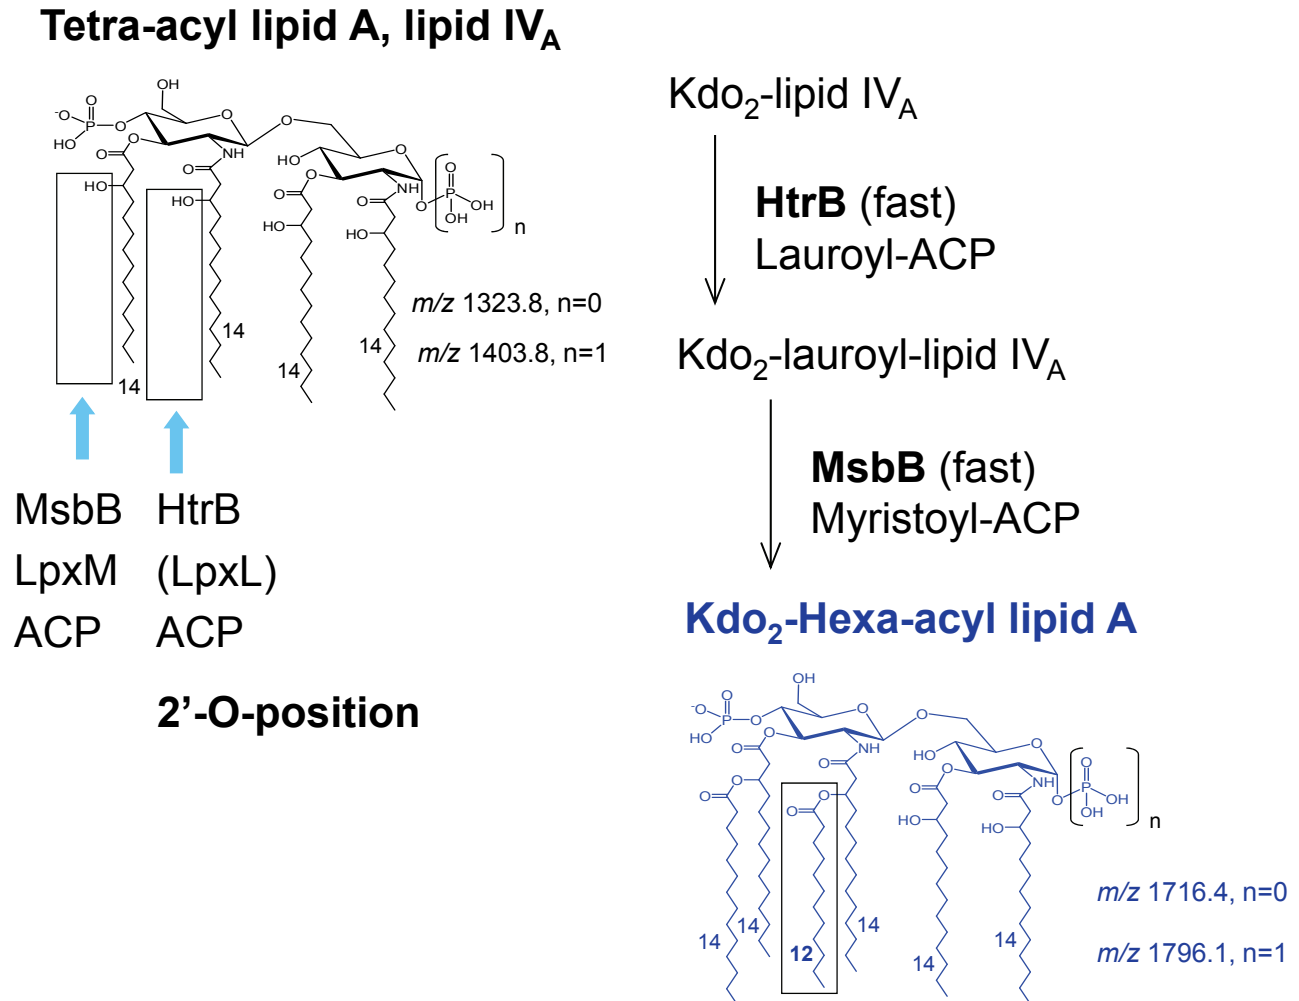

**Supplementary Figure S1:** *E. coli* “late” Acylations of lipid A precursor (Kdo<sub>2</sub>-lipid IV<sub>A</sub>). Biosynthetic pathway from tetra acyl lipid A to hexa acyl lipid A as suggested by various studies, i.e., by Clementz et al., **1996**. *J. Biol. Chem.* 271:12095–12102. Briefly, in *E. coli*, late acyltransferase enzymes LpxL and LpxM sequentially add the fifth and sixth fatty acids, respectively, to precursor lipid IV<sub>A</sub> (tetra-acyl lipid A) after glycosylation with two 3-deoxy-D-manno-octulosonic acid (Kdo) sugars. In *E. coli*, laurate transferase, encoded by *lpxL* (formerly *htrB*), acylates (Kdo)<sub>2</sub>-lipid IV<sub>A</sub>, adding a lauric acid (12:0) to 3-hydroxymyristic acid [14:0(3-OH)] at the 2' position of the distal glucosamine. *E. coli* myristate transferase, encoded by *lpxM* (formerly *msbB*), uses the penta-acylated lipid A structure as a substrate, adding a myristic acid (14:0) onto 3-hydroxymyristic acid [14:0(3-OH)], which is located at the 3' position of the distal glucosamine.

## Supplementary Table S1: Primer Table

| Target Gene   | Primer/Probe | Sequence             | Length (bp) |
|---------------|--------------|----------------------|-------------|
| <i>rrsA</i>   | Forward      | CGTGGCTTCCGGAGCTAAC  | 60          |
|               | Reverse      | TTTAACCTTGCGGCCGTACT |             |
|               | Probe        | CGTTAAGTCGACCGCCT    |             |
| <i>lpxL</i> * | Forward      | TGCGCGGCAGTTTGG      | 53          |
|               | Reverse      | TCGTTCGGGCGATAAACG   |             |
|               | Probe        | TGCAGGAACCGGTAT      |             |

\* *lpxL* formerly known as *htrB*

## Supplementary Figure S2

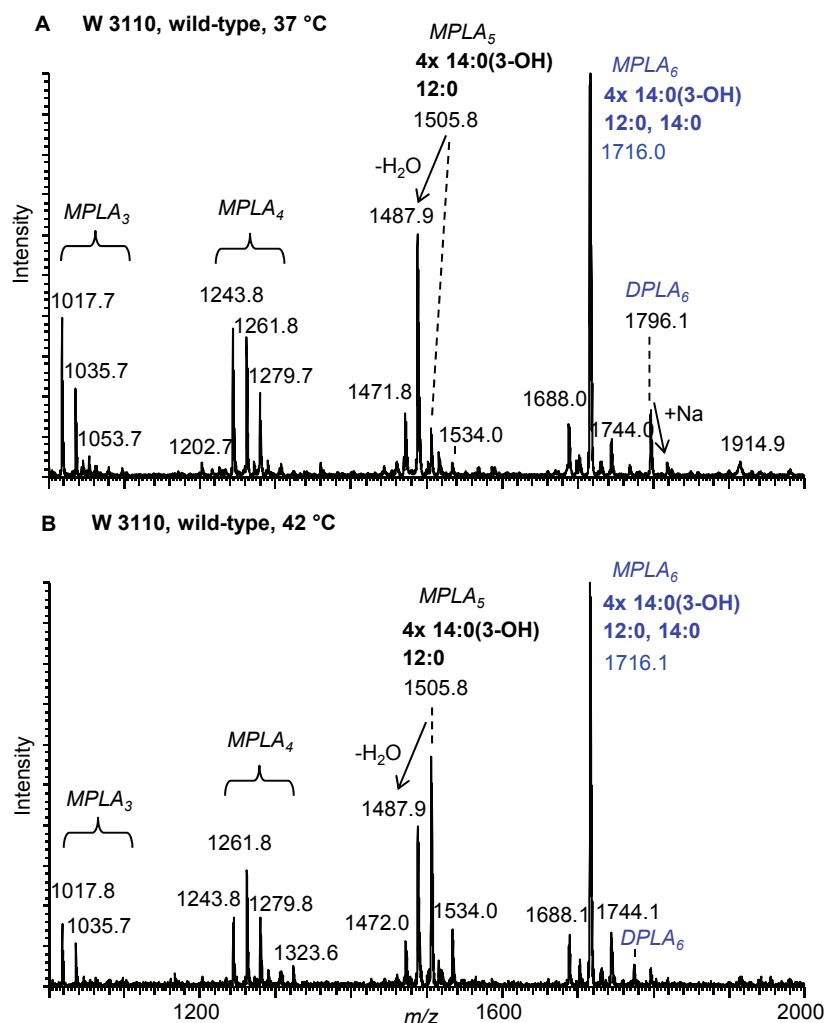

**Supplementary Figure S2:** Negative-ion MALDI-MS spectra from *E. coli* wild-type strain W3110. MALDI-MS of lipid A isolated from *E. coli* wild-type strain W3110 grown A) at 37°C and B) at 42°C. Lipid A mass peaks are annotated with the assigned composition of fatty acids. As expected, the major lipid A species was observed at  $m/z$  1716.0 and  $m/z$  1716.1 at 37 and 42°C that correspond to the typical wild-type mono-phosphoryl hexa-acyl lipid A ( $MPLA_6$ ) containing four primary 3-hydroxymyristic acids, one secondary myristic acid, and one secondary lauric acid, [4x 14:0(3-OH), 14:0, 12:0]. Other components of the heterogeneous lipid A mixture were observed at  $m/z$  1505.8, corresponding to penta-acyl  $MPLA_5$ , as well as tetra-acyl  $MPLA_4$  at  $m/z$  1279.7, consisting of one lauric and three or four 3-hydroxymyristic acids, respectively.

Supplementary Figure S3 *E. coli* – *lpxL*- mutant lipid A structures

**Pentaacyl lipid A**

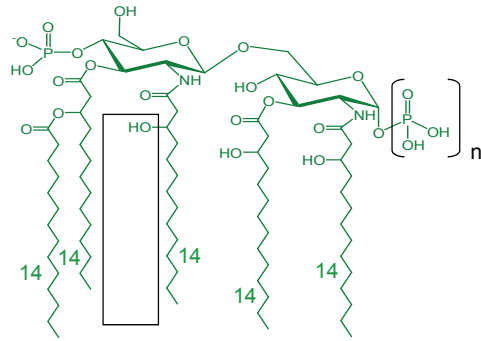

***MPLA*<sub>5</sub>** *m/z* 1533.8, *n*=0

***DPLA*<sub>5</sub>** *m/z* 1614.0, *n*=1

**expected pentaacyl lipid A species  
(observed at 30, 37, and 42 °C)**

**Pentaacyl lipid A**

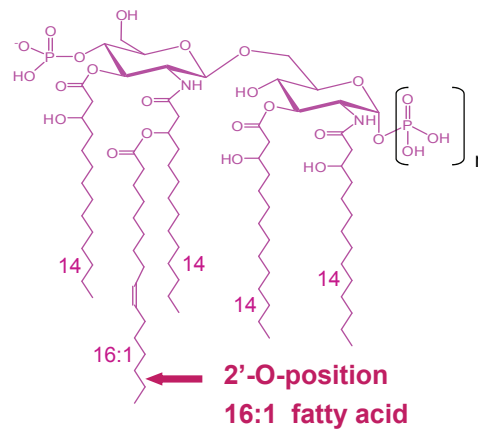

***MPLA*<sub>5</sub>** *m/z* 1559.8, *n*=0

**predominantly observed at 37 °C**

**Pentaacyl lipid A**

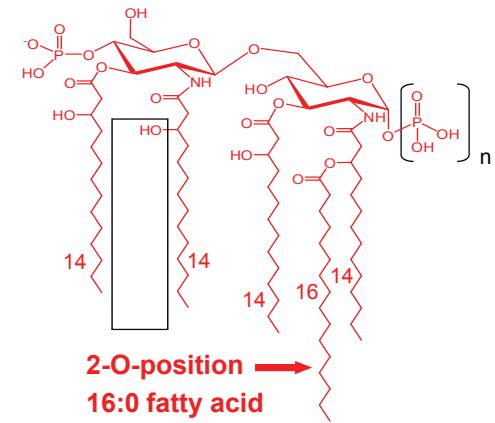

***MPLA*<sub>5</sub>** *m/z* 1561.8, *n*=0

**predominantly observed at 42 °C**

**Hexaacyl lipid A**

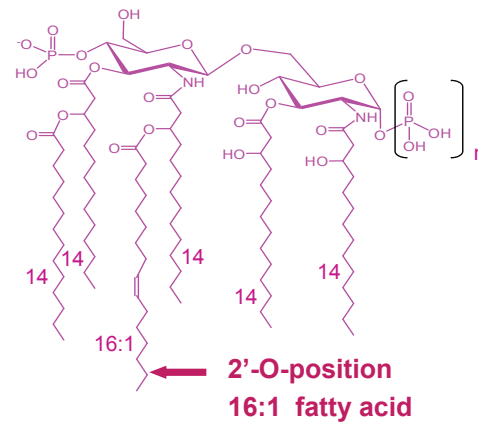

***MPLA*<sub>6</sub>** *m/z* 1769.8, *n*=0

**predominantly observed at 37 °C**

**Hexaacyl lipid A**

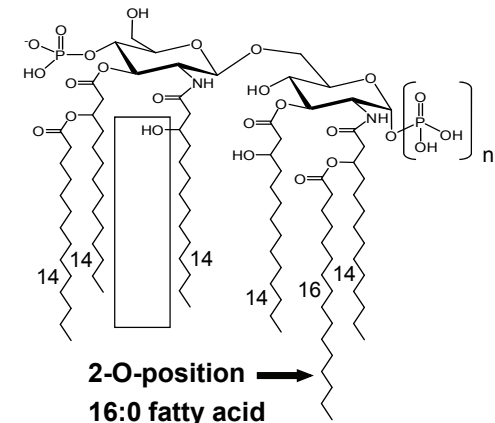

***MPLA*<sub>6</sub>** *m/z* 1772.1, *n*=0

**predominantly observed at 42 °C**

## Supplementary Figure S3 - continued

### Tetraacyl lipid A

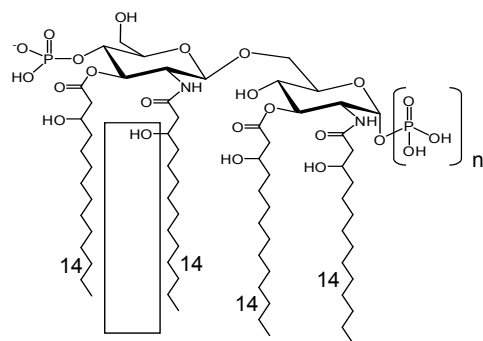

**MPLA<sub>4</sub>** *m/z* 1323.8, *n*=0

**DPLA<sub>4</sub>** *m/z* 1403.8, *n*=1

**Tetraacyl lipid A species**  
**(observed at 30, 37, and 42 °C)**

### Supplementary Figure S3:

Overview of observed lipid A species from *E. coli lpxL* mutant strain grown at different temperatures (at 30°C, at 37°C, and at 42°C). *E. coli lpxL* mutant strain MLK217 is lacking a lauric acid in its structure (12:0 fatty acid,  $\Delta M = -182$  Da) and accordingly *lpxL* mutant strain showed the expected pentaacyl lipid A species (marked in green) consisting of four 3-hydroxymyristic acids [4x 14:0(3OH)] and one myristic acids [14:0] in secondary 3'-O position (distal glucosamine) under all temperature growth conditions.

At 37°C the predominant pentaacyl species consisted of four 3-hydroxymyristic acids [4x 14:0(3OH)] and one palmitoleic acid [16:1] in secondary 2'-O position (distal glucosamine), marked in pink. In contrast, at 42°C, the lipid A profile changed to a pentaacyl species consisting of four 3-hydroxymyristic acids [4x 14:0(3OH)] and one palmitic acid [16:0] in secondary 2-O position (proximal glucosamine). Similarly, corresponding hexaacyl species were observed at 37°C with the following fatty acid composition, specifically [4x 14:0(3OH), 14:0, 16:1] with the palmitoleic acid [16:1] in secondary 2'-O position (distal glucosamine).

At 42°C a hexaacyl lipid A species was observed with a fatty acid composition of [4x 14:0(3OH), 14:0, 16:0] with the palmitic acid [16:0] in secondary 2-O position (proximal glucosamine). The tetraacyl lipid A species consisting of four 3-hydroxymyristic acids [4x 14:0(3OH)] was observed under all temperature conditions.

## Supplementary Figure S4-A

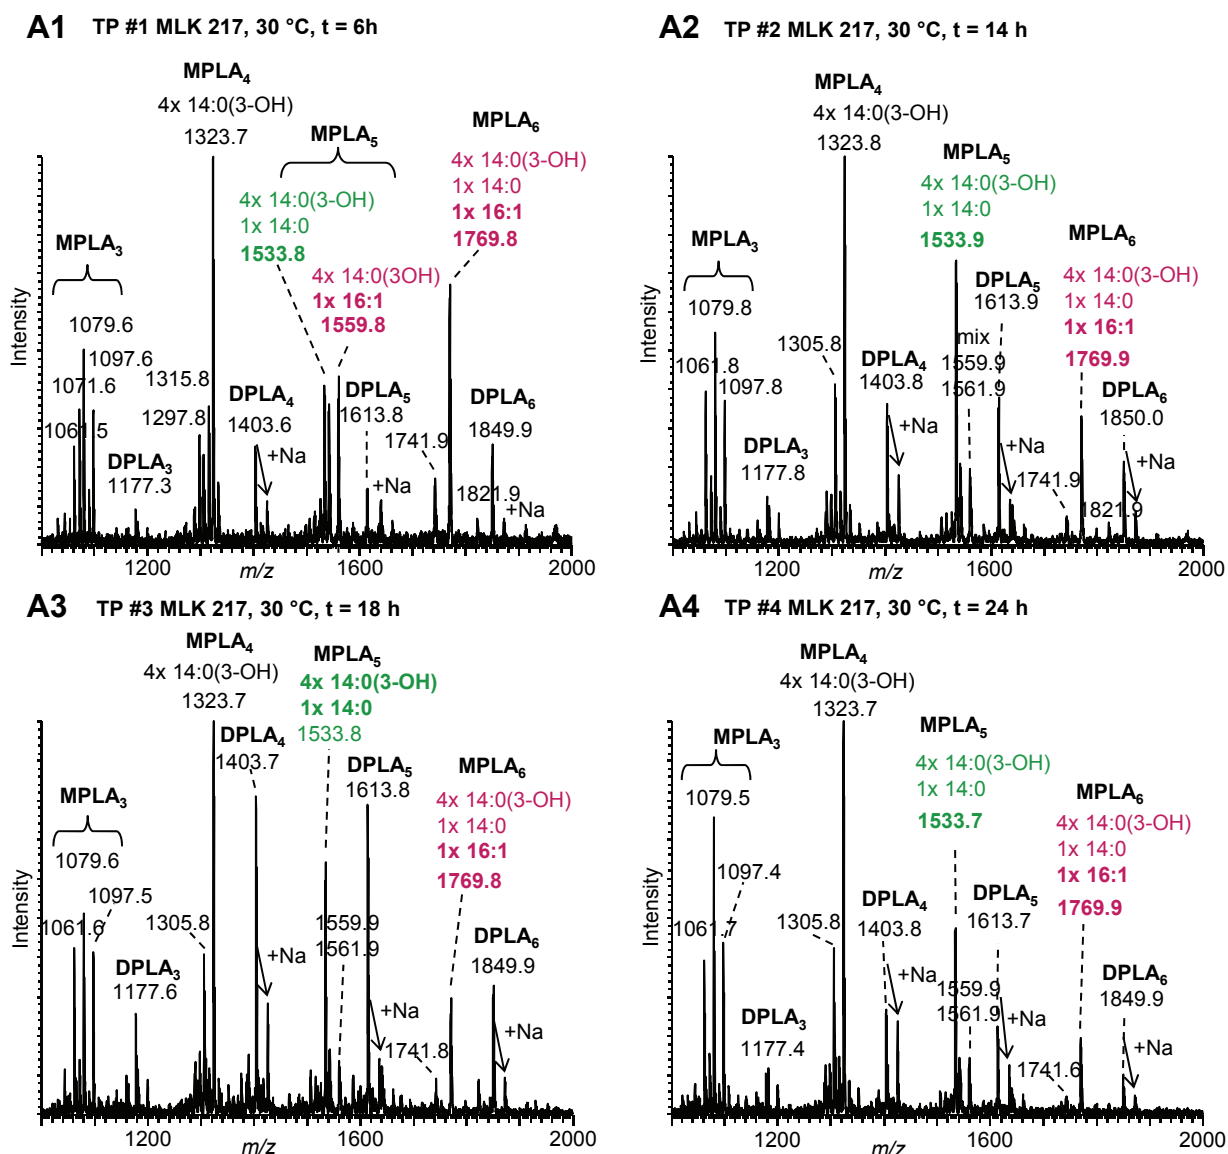

**Supplementary Figure S4-A:** Negative-ion MALDI-MS profiles of lipid As following a time-course study. MALDI-LIT MS of lipid A isolated from *E. coli lpxL* mutant strain MLK217 grown at 30°C for A1) 6 hours, A2) 14 hours, A3) 18 hours, and A4) 24 hours. *E. coli lpxL* mutant strain MLK217 is lacking a lauric acid in its structure (12:0 fatty acid,  $\Delta M = -182$  Da). Lipid A mass peaks are annotated with the assigned composition of fatty acids. Major lipid A species observed were the tetraacyl species consisting of four 3-hydroxymyristic acids [4x 14:0(3OH)] (at  $m/z$  1323.8), and the expected pentaacyl species consisting of four 3-hydroxymyristic acids [4x 14:0(3OH)] and one myristic acids [14:0] in secondary 3'-O position (at  $m/z$  1533.9). A less abundant hexaacyl species was observed at  $m/z$  1769.9 corresponding to a fatty acid composition of [4x 14:0(3OH), 14:0, 16:1] with the palmitoleic acid [16:1] in secondary 2'-O position. During the time-course lipid A acylation patterns and acyl group compositions do vary slightly but not significantly.

## Supplementary Figure S4-B

**B1** TP #1: MLK 217, 37 °C, 4 h

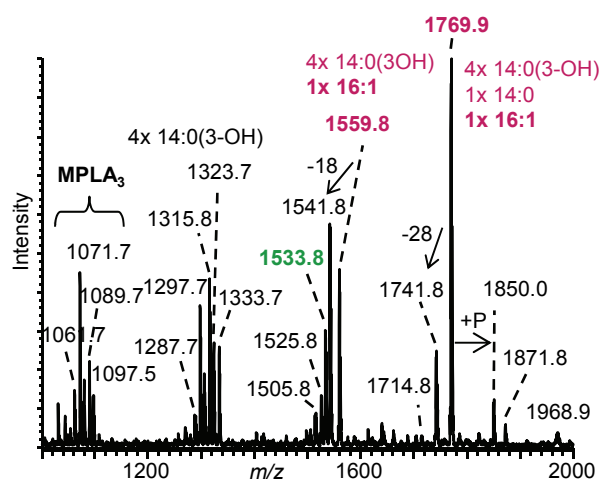

**B2** TP #2: MLK 217, 37 °C, 6 h

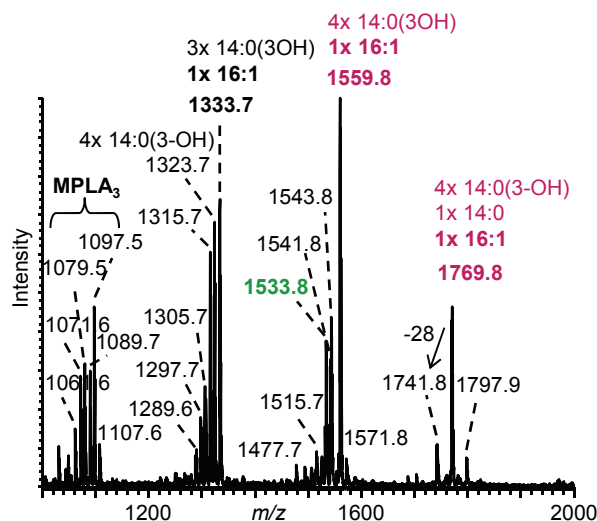

**B3** TP #3: MLK 217, 37 °C, 14 h

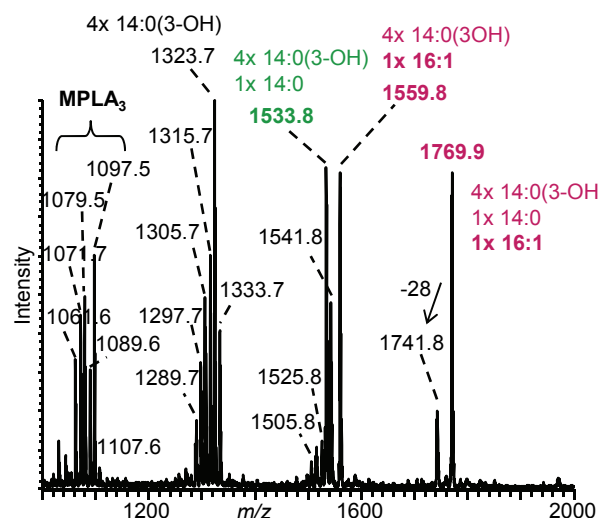

**B4** TP #4: MLK 217, 37 °C, 24 h

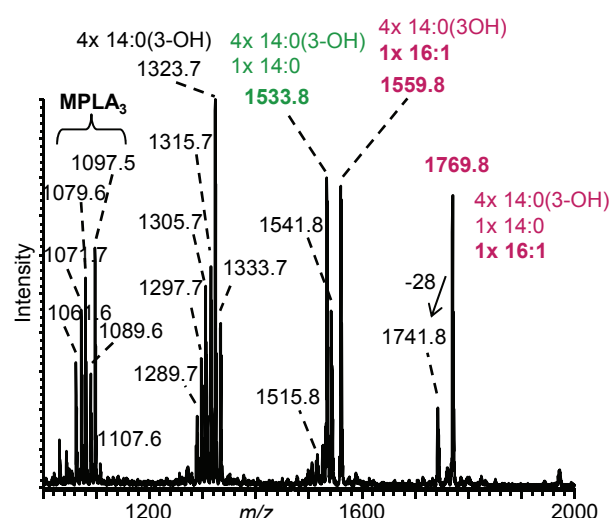

**Supplementary Figure S4-B:** Negative-ion MALDI-MS of lipid A following a time-course study. MALDI-MS of lipid A isolated from *E. coli* *lpxL* mutant strain MLK217 grown at 37°C for B1) 4 hours, B2) 6 hours, B3) 14 hours, and B4) 24 hours. *E. coli* *lpxL* mutant strain MLK217 is lacking a lauric acid in its structure (12:0 fatty acid,  $\Delta M = -182$  Da). Lipid A mass peaks are annotated with the assigned composition of fatty acids. Besides the tetraacyl species at  $m/z$  1323.8 [4x 14:0(3OH)], and the expected pentaacyl species at  $m/z$  1533.9 [4x 14:0(3OH), 14:0] with 14:0 in secondary 3'-O position, major lipid A species were observed at  $m/z$  1559.8 [4x 14:0(3OH), 16:1] and at  $m/z$  1769.9 [4x 14:0(3OH), 14:0, 16:1], both of the latter structures featuring the palmitoleic acid [16:1] in secondary 2'-O position (distal glucosamine). Lipid A acylation patterns and acyl group compositions do not significantly vary during the time-course.

## Supplementary Figure S4-C

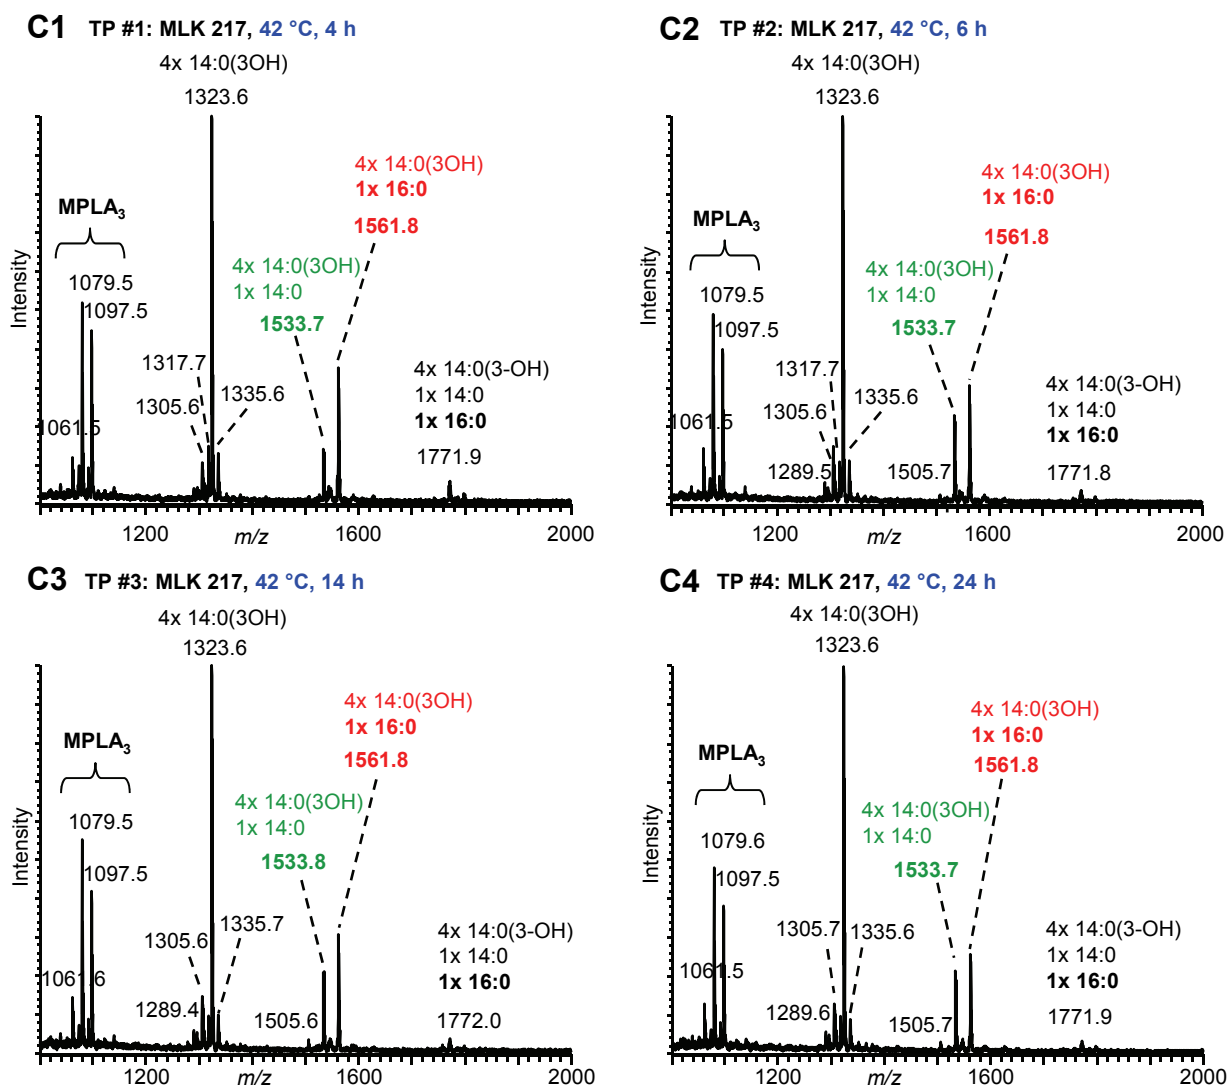

**Supplementary Figure S4-C:** Negative-ion MALDI-MS of lipid A following a time-course study. MALDI-MS of lipid A isolated from *E. coli lpxL* mutant strain MLK217 grown at 42°C for C1) 4 hours, C2) 6 hours, C3) 14 hours, and C4) 24 hours. *E. coli lpxL* mutant strain MLK217 is lacking a lauric acid in its structure (12:0 fatty acid,  $\Delta M = -182$  Da). Lipid A mass peaks are annotated with the assigned composition of fatty acids. Besides the tetraacyl species at  $m/z$  1323.8 [4x 14:0(3OH)], and the expected pentaacyl species at  $m/z$  1533.9 [4x 14:0(3OH), 14:0] with 14:0 in secondary 3'-O position, major lipid A species were observed at  $m/z$  1561.8 [4x 14:0(3OH), 16:0] and at  $m/z$  1772.0 [4x 14:0(3OH), 14:0, 16:0], both of the latter structures featuring the palmitic acid [16:0] in secondary 2-O position (proximal glucosamine). Lipid A acylation patterns and acyl group compositions do not significantly vary during the time-course.



## Supplementary Figure S5

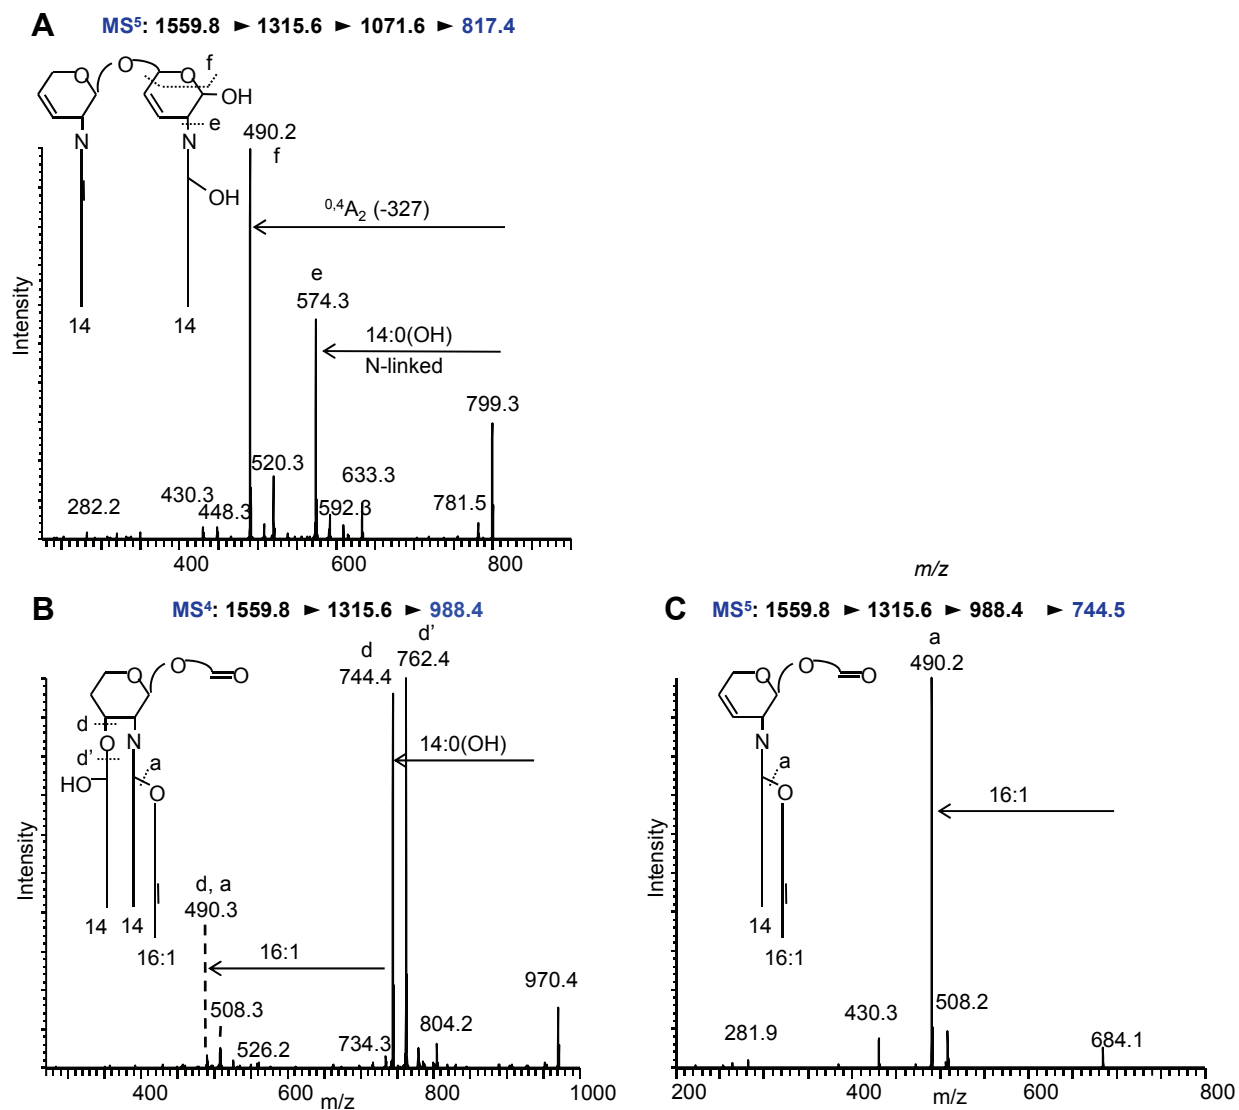

**Supplementary Figure S5:** Additional negative-ion MALDI-MS<sup>n</sup> spectra of pentaacyl lipid A from *E. coli* mutant strain MLK217 (*lpxL*) grown at 37°C. MS<sup>n</sup> spectra of penta-acyl lipid A species at *m/z* 1559.8 [4x 14:0(3-OH), 16:1] with the palmitoleic acid [16:1] in 2'-O-position (on the distal glucosamine); also see Fig. 5 (main manuscript). (A) MS<sup>5</sup> of *m/z* 817.4 (selected from MS<sup>4</sup> 1071.6, selected from MS<sup>3</sup> 1315.6, selected from MS<sup>2</sup> 1559.8); (B) MS<sup>4</sup> of *m/z* 988.4 (selected from MS<sup>3</sup> 1315.6, selected from MS<sup>2</sup> 1559.8); and (C) MS<sup>5</sup> of *m/z* 744.5 (selected from MS<sup>4</sup> 988.4, selected from MS<sup>3</sup> 1315.6, selected from MS<sup>2</sup> 1559.8).

# Supplementary Figure S6

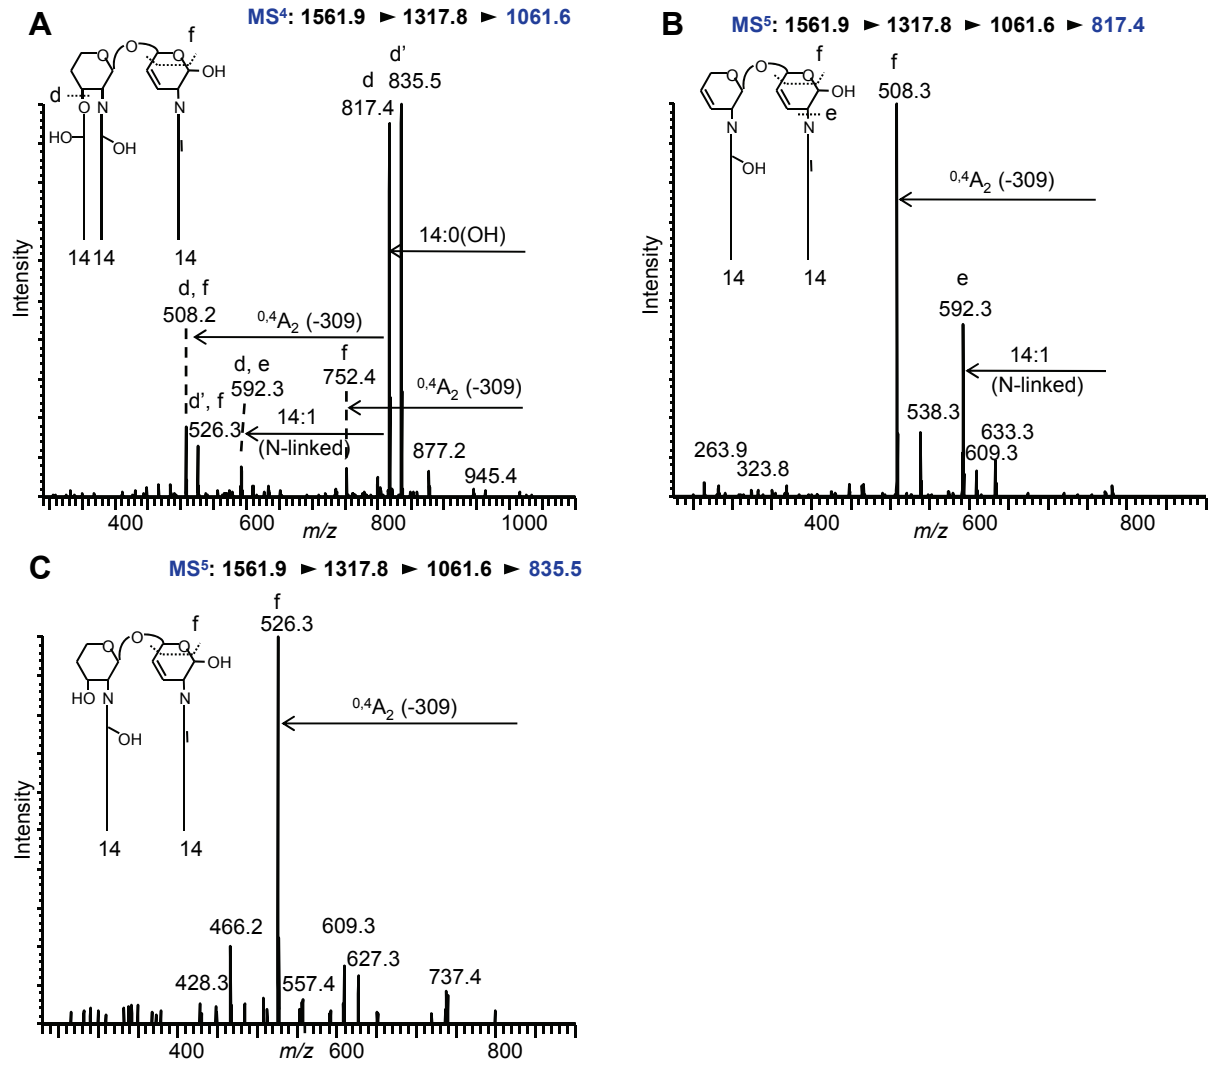

see next page, to be continued

## Supplementary Figure S6 - continued

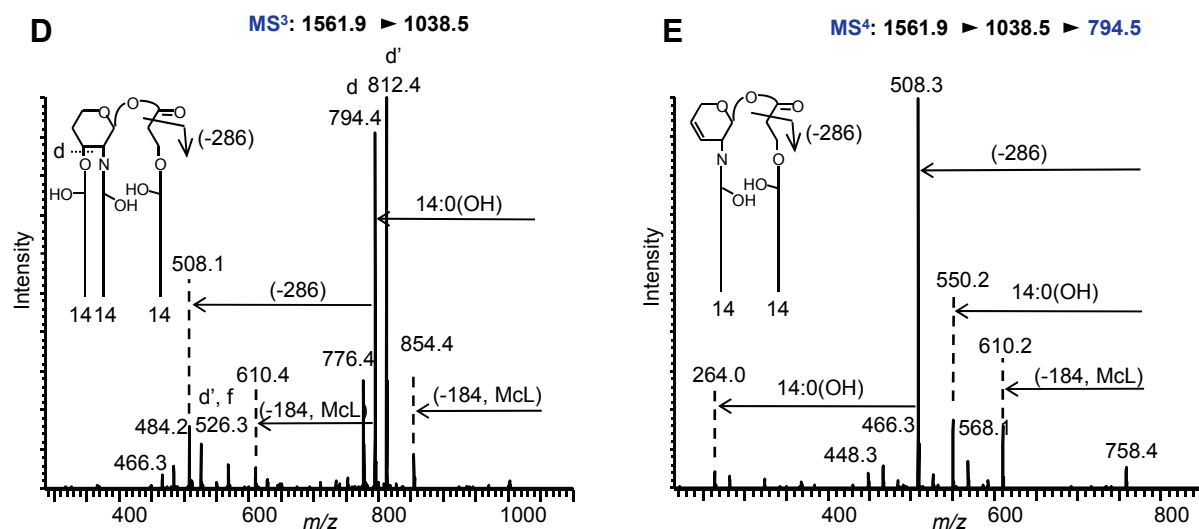

### Supplementary Figure S6:

Additional negative-ion MALDI- $MS^n$  spectra of pentaacyl lipid A from *E. coli* mutant strain MLK217 (*lpxL*) grown at 42°C.  $MS^n$  spectra of pentaacyl lipid A species at  $m/z$  1561.9 [4x 14:0(3-OH), 16:0] with the palmitic acid [16:0] in 2-O-position (on the proximal glucosamine); also see Fig. 6 (main manuscript). (A)  $MS^4$  of  $m/z$  1061.6 (selected from  $MS^3$  1317.8, selected from  $MS^2$  1561.9); (B)  $MS^5$  of  $m/z$  817.4 (selected from  $MS^4$  1061.6, selected from  $MS^3$  1317.8, selected from  $MS^2$  1561.9); (C)  $MS^5$  of  $m/z$  835.5 (selected from  $MS^4$  1061.6, selected from  $MS^3$  1317.8, selected from  $MS^2$  1561.9); (D)  $MS^3$  of  $m/z$  1038.5 (selected from  $MS^2$  1561.9); (E)  $MS^4$  of  $m/z$  794.5 (selected from  $MS^3$  1038.5, selected from  $MS^2$  1561.9). The abbreviation 'McL' indicates a McLafferty rearrangement.

# Supplementary Figure S7

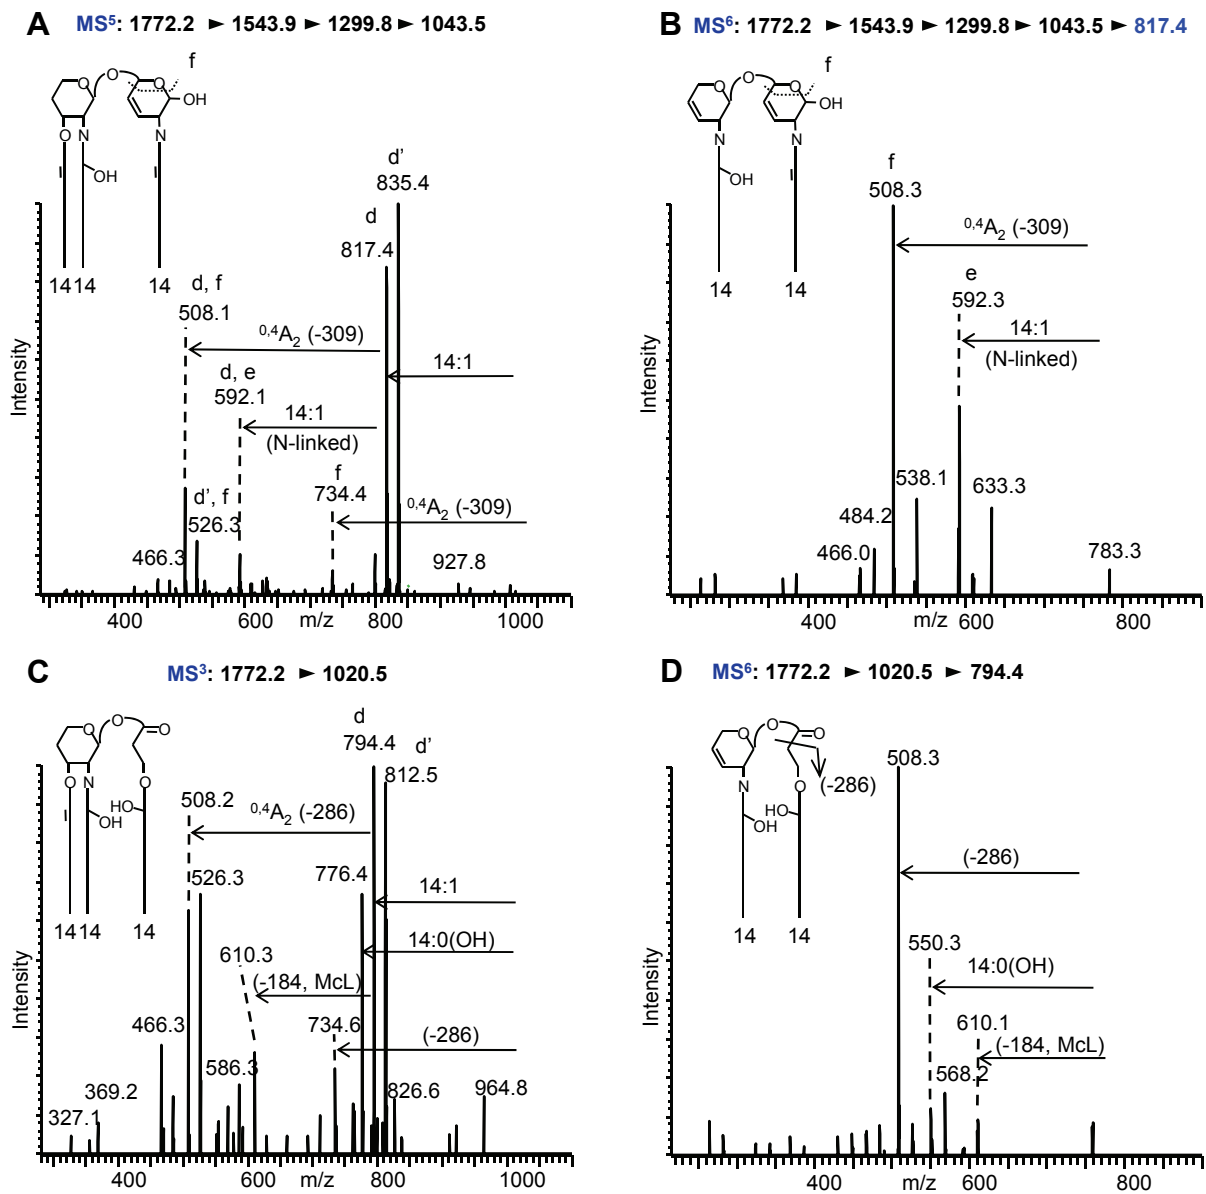

see next page, to be continued

## Supplementary Figure S7 - continued

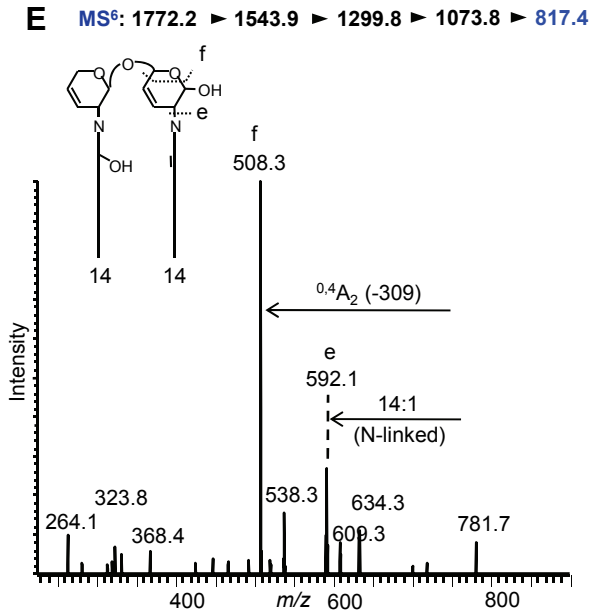

### Supplementary Figure S7:

Negative-ion MALDI- MS<sup>n</sup> spectrum of hexaacyl lipid A at  $m/z$  1772.2 from *E. coli* mutant strain MLK217 (*lpxL*) grown at 42°C. MS<sup>n</sup> spectra of hexaacyl lipid A species at  $m/z$  1772.2 [4x 14:0(3-OH), 14:0, 16:0] with the palmitic acid [16:0] in 2-O-position (on the proximal glucosamine) are shown in Figure 7. Additional fragmentation details are shown here with (A) MS<sup>5</sup> of  $m/z$  1043.5 (selected from MS<sup>4</sup> of  $m/z$  1299.8, selected from MS<sup>3</sup> 1543.9, selected from MS<sup>2</sup> 1772.2); (B) MS<sup>6</sup> of  $m/z$  817.4 (selected from MS<sup>5</sup> of  $m/z$  1043.5, selected from MS<sup>4</sup> of  $m/z$  1299.8, selected from MS<sup>3</sup> 1543.9, selected from MS<sup>2</sup> 1772.2); (C) MS<sup>3</sup> of  $m/z$  1020.5 (selected from MS<sup>2</sup> 1772.2); (D) MS<sup>4</sup> of  $m/z$  794.4 (selected from MS<sup>3</sup>  $m/z$  1020.5, selected from MS<sup>2</sup> 1772.2); and (E) MS<sup>6</sup> of  $m/z$  817.4 (selected from MS<sup>5</sup> of  $m/z$  1073.8, selected from MS<sup>4</sup> of  $m/z$  1299.8, selected from MS<sup>3</sup> 1543.9, selected from MS<sup>2</sup> 1772.2). The abbreviation 'McL' indicates a McLafferty rearrangement.

# Supplementary Figure S8

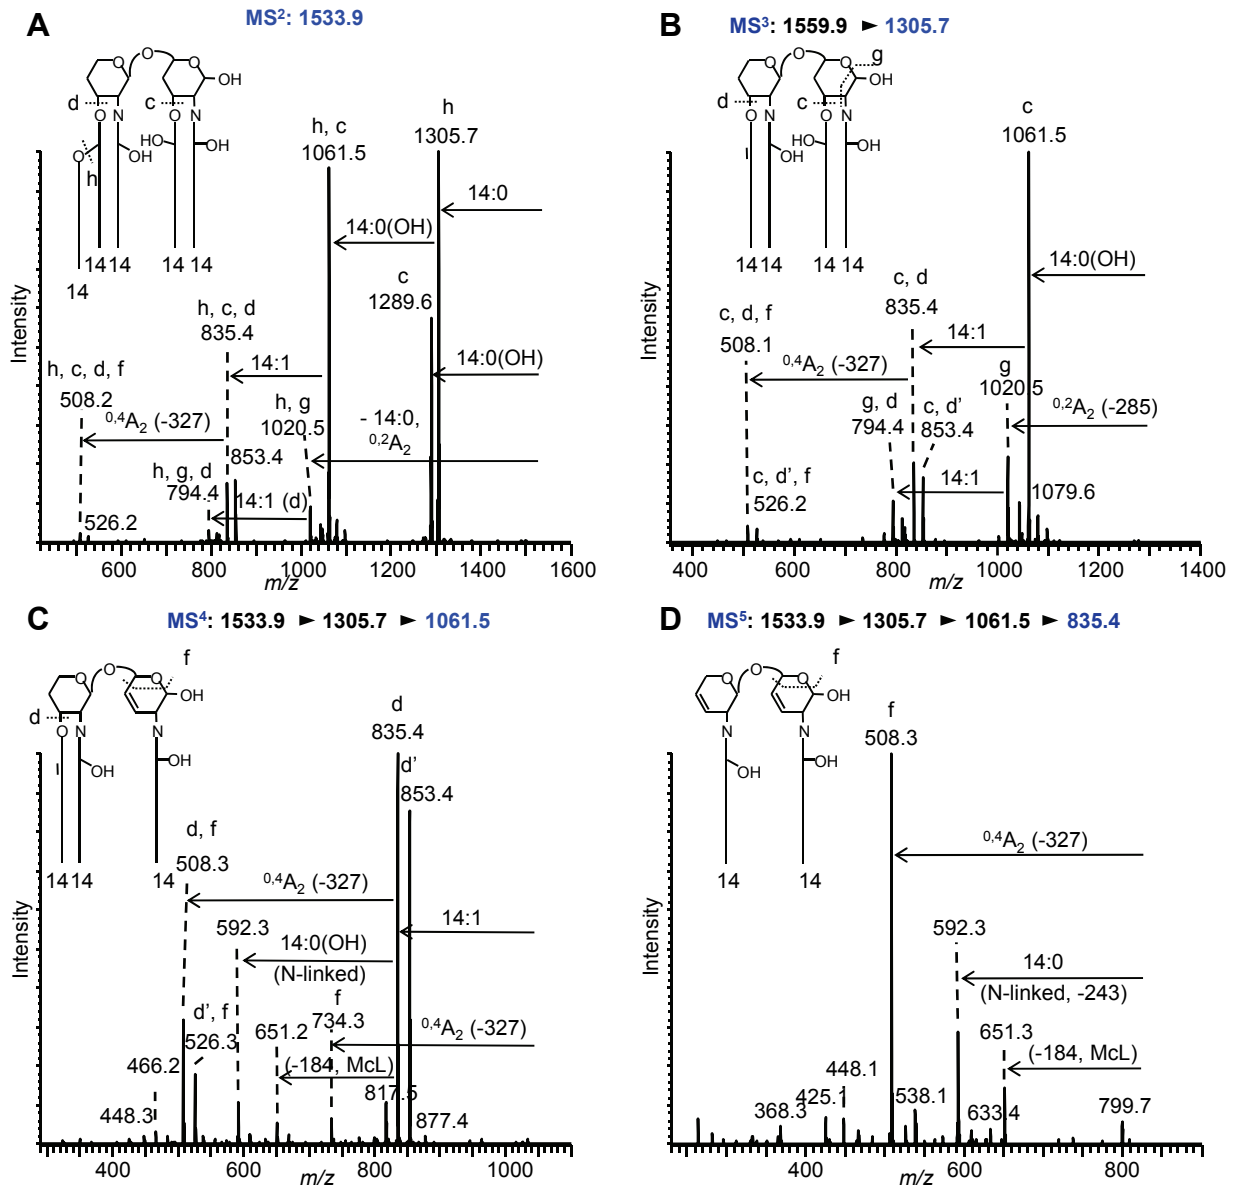

## Supplementary Figure S8:

Negative-ion MALDI-MS<sup>n</sup> spectra of pentaacyl lipid A at *m/z* 1533.9 from *E. coli* mutant strain MLK217 (*lpxL*) grown at 42°C lacking a lauric acid in its structure (12:0 fatty acid, ΔM = -182 Da) [corresponding fragmentation patterns are obtained from *E. coli* mutant strain MLK217 (*lpxL*) grown at lower temperature (i.e., 30° and 37°C)]. MS<sup>n</sup> spectra of penta-acyl lipid A species at *m/z* 1533.9 [4x 14:0(3-OH), 14:0] with the myristic acid [14:0] in 2'-O-position (on the distal glucosamine). (A) MS<sup>2</sup> of *m/z* 1533.9; (B) MS<sup>3</sup> of *m/z* 1305.7 (selected from MS<sup>2</sup> 1533.9); (C) MS<sup>4</sup> of *m/z* 1061.5 (selected from MS<sup>3</sup> 1305.7, selected from MS<sup>2</sup> 1533.9); (D) MS<sup>5</sup> of *m/z* 835.4 (selected from MS<sup>4</sup> 1061.5, selected from MS<sup>3</sup> 1305.7, selected from MS<sup>2</sup> 1533.9); (E) MS<sup>3</sup> of *m/z* 1289.6 (selected from MS<sup>2</sup> 1533.9); (F) MS<sup>4</sup> of *m/z* 1061.5 (selected from MS<sup>3</sup> 1289.6, selected from MS<sup>2</sup> 1533.9); (G) MS<sup>5</sup> of *m/z* 835.5 (selected from MS<sup>4</sup> 1061.5, selected from MS<sup>3</sup> 1289.6, selected from MS<sup>2</sup> 1533.9). The abbreviation 'McL' indicates a McLafferty rearrangement.

see next page, to be continued

# Supplementary Figure S8 - continued

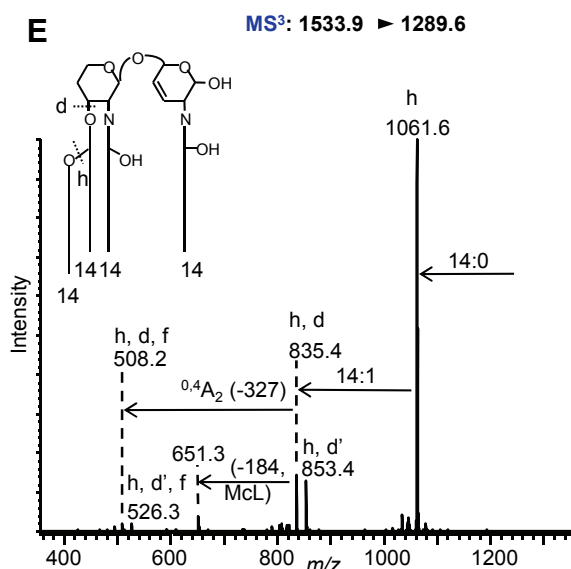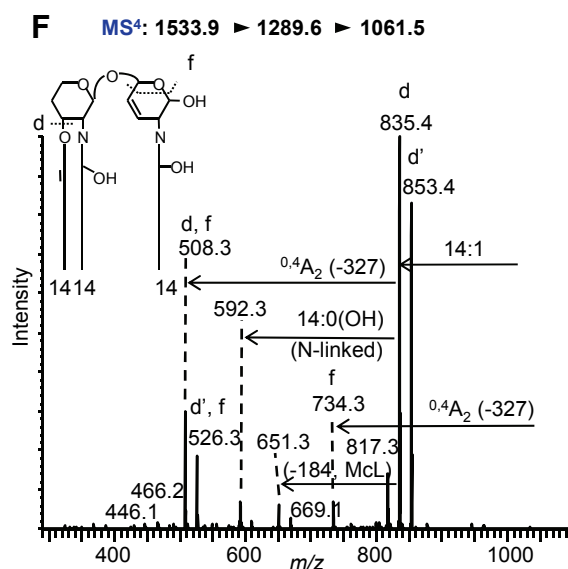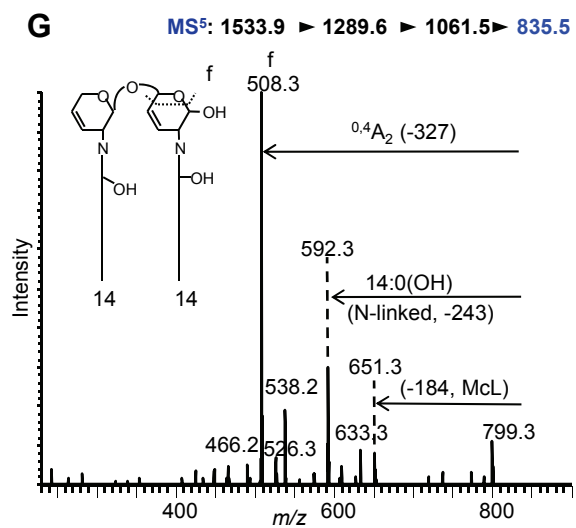

# Supplementary Figure S9-A

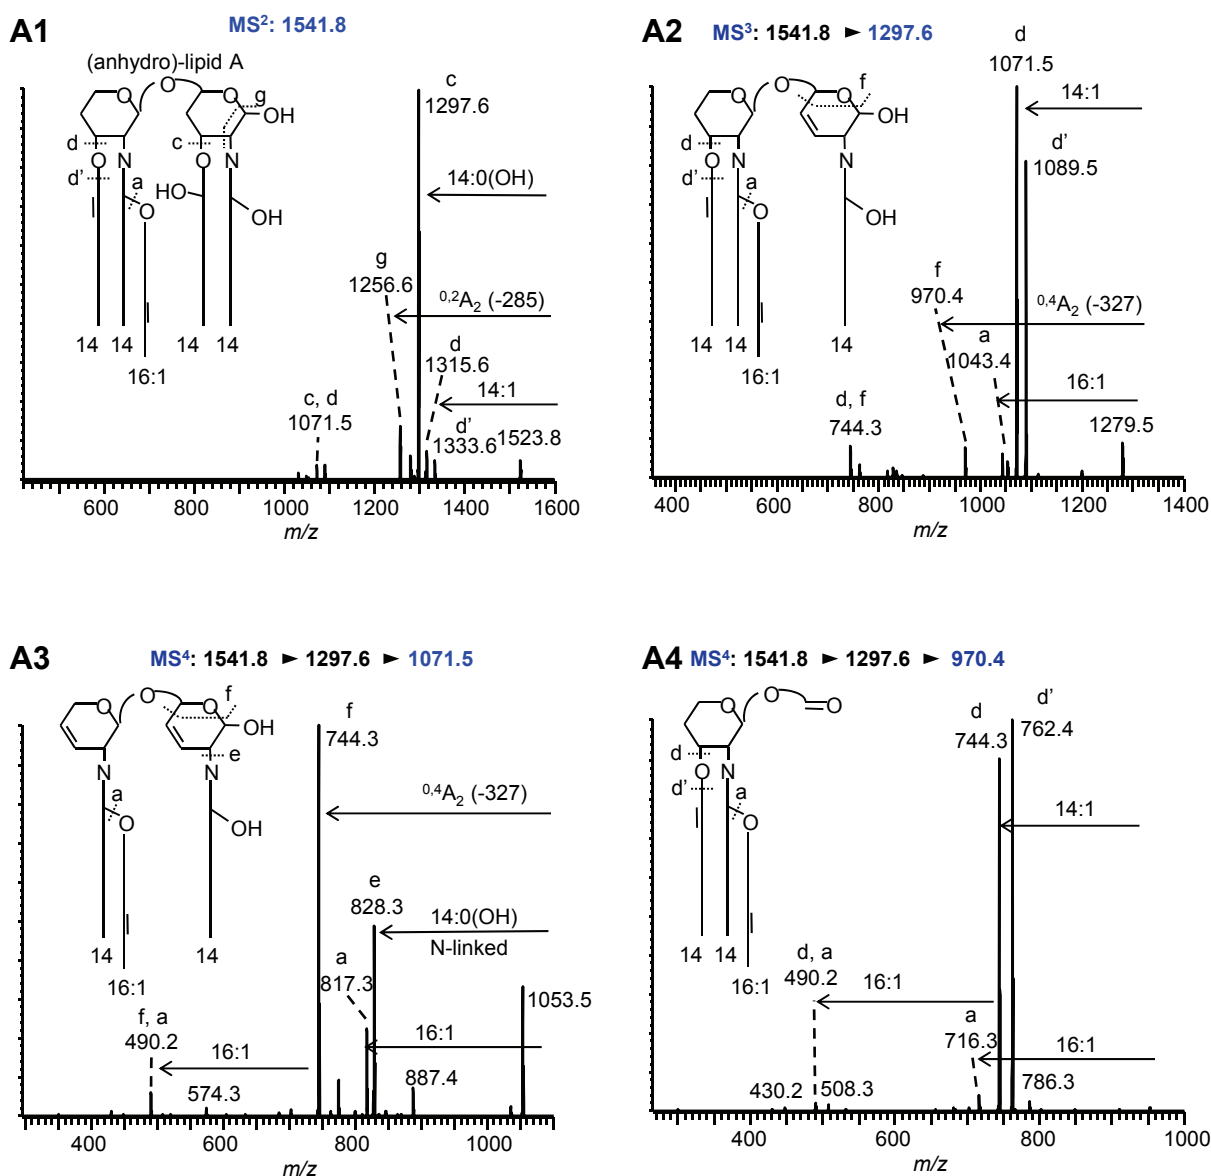

**Supplementary Figure S9-A:** Negative-ion MALDI-MS<sup>n</sup> spectra of pentaacyl lipid A from *E. coli* mutant strain MLK217 (*lpxL*) grown at 37°C. MS<sup>n</sup> spectra of pentaacyl lipid A species at *m/z* 1541.8 anhydro-[4x 14:0(3-OH), 16:1] with the palmitoleic acid [16:1] in 2'-O-position (on the distal glucosamine); lipid A species with *m/z* [1559.8 – H<sub>2</sub>O]. (A1) MS<sup>2</sup> of *m/z* 1541.8; (A2) MS<sup>3</sup> of *m/z* 1297.6; (A3) MS<sup>4</sup> of *m/z* 1071.5; (A4) MS<sup>4</sup> of *m/z* 970.4.



## Supplementary Figure S9-B

Low abundant isoform mixture of lipid A species with fatty acid compositions such as  
[4x 14:0(3-OH), 14:0, 14:1]  
[4x 14:0(3-OH), 12:0, 16:1]

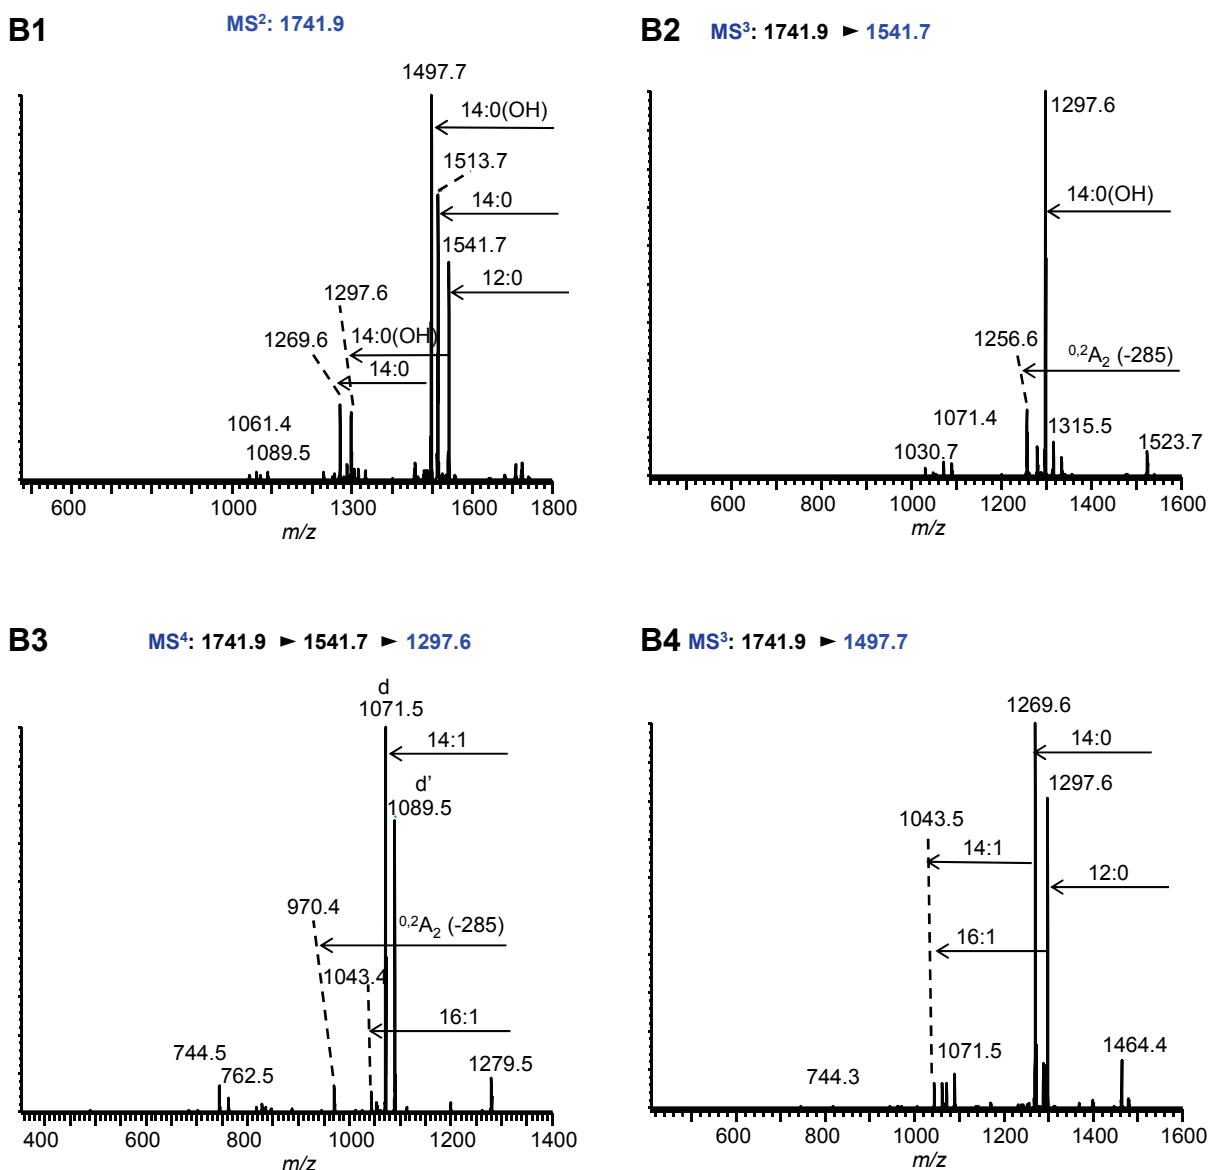

**Supplementary Figure S9-B:** Negative-ion MALDI-MS<sup>n</sup> spectra of hexaacyl lipid A from *E. coli* mutant strain MLK217 (*lpxL*) grown at 37°C. MS<sup>n</sup> spectra of hexaacyl lipid A species at *m/z* 1741.8 that appears to be a mixture of different lipid A species, i.e., [4x 14:0(3-OH), 14:0, 14:1], and [4x 14:0(3-OH), 12:0, 16:1] with the unsaturated acyl group [16:1 and 14:1, respectively] in 2<sup>1</sup>-O-position (on the distal glucosamine). These lipid A species were detected at low levels (Fig. 2B). (B1) MS<sup>2</sup> of *m/z* 1741.9; (B2) MS<sup>3</sup> of *m/z* 1541.7; (B3) MS<sup>4</sup> of *m/z* 1297.6; (B4) MS<sup>3</sup> of *m/z* 1497.7.

## Supplementary Figure S9-C

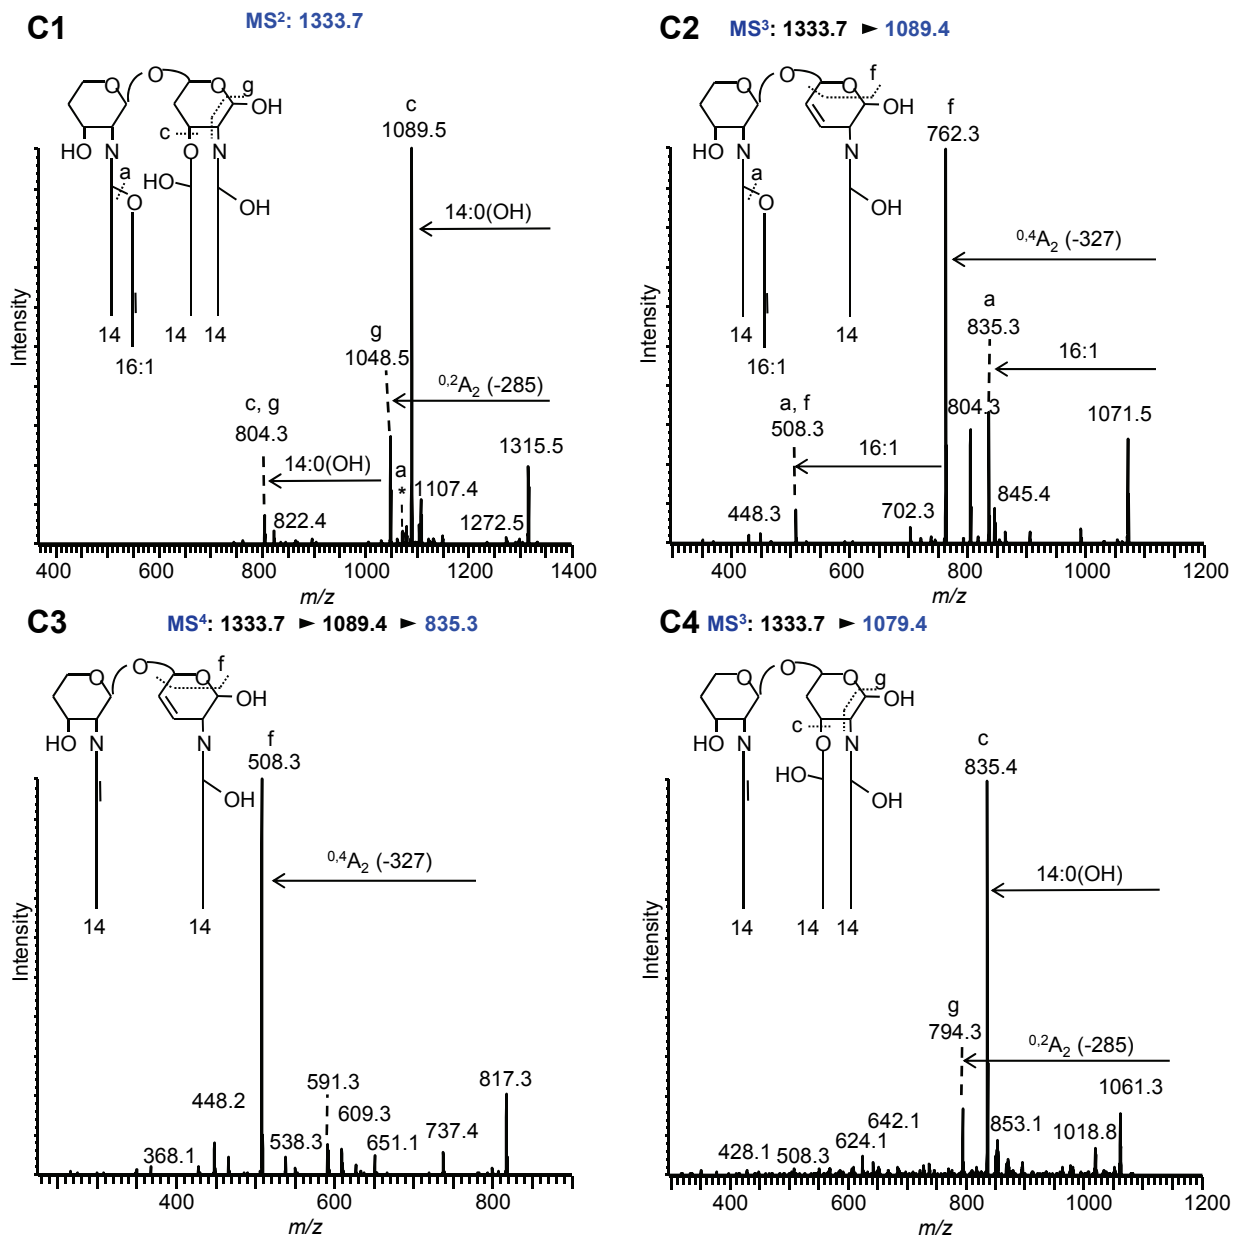

**Supplementary Figure S9-C:** Negative-ion MALDI-MS<sup>n</sup> spectra of tetraacyl lipid A from *E. coli* mutant strain MLK217 (*lpxL*) grown at 37°C. MS<sup>n</sup> spectra of tetraacyl lipid A species at *m/z* 1333.7 [3x 14:0(3-OH), 16:1] with the palmitoleic acid [16:1] in 2'-O-position (on the distal glucosamine). (C1) MS<sup>2</sup> of *m/z* 1333.7; the asterisk \* indicates the minor fragment ion *m/z* 1079.4 which in panel (C4) is selected for further MS<sup>3</sup> fragmentation. (C2) MS<sup>3</sup> of *m/z* 1089.4; (C3) MS<sup>4</sup> of *m/z* 835.3; (C4) MS<sup>3</sup> of *m/z* 1079.4.

# Supplementary Figure S9-D

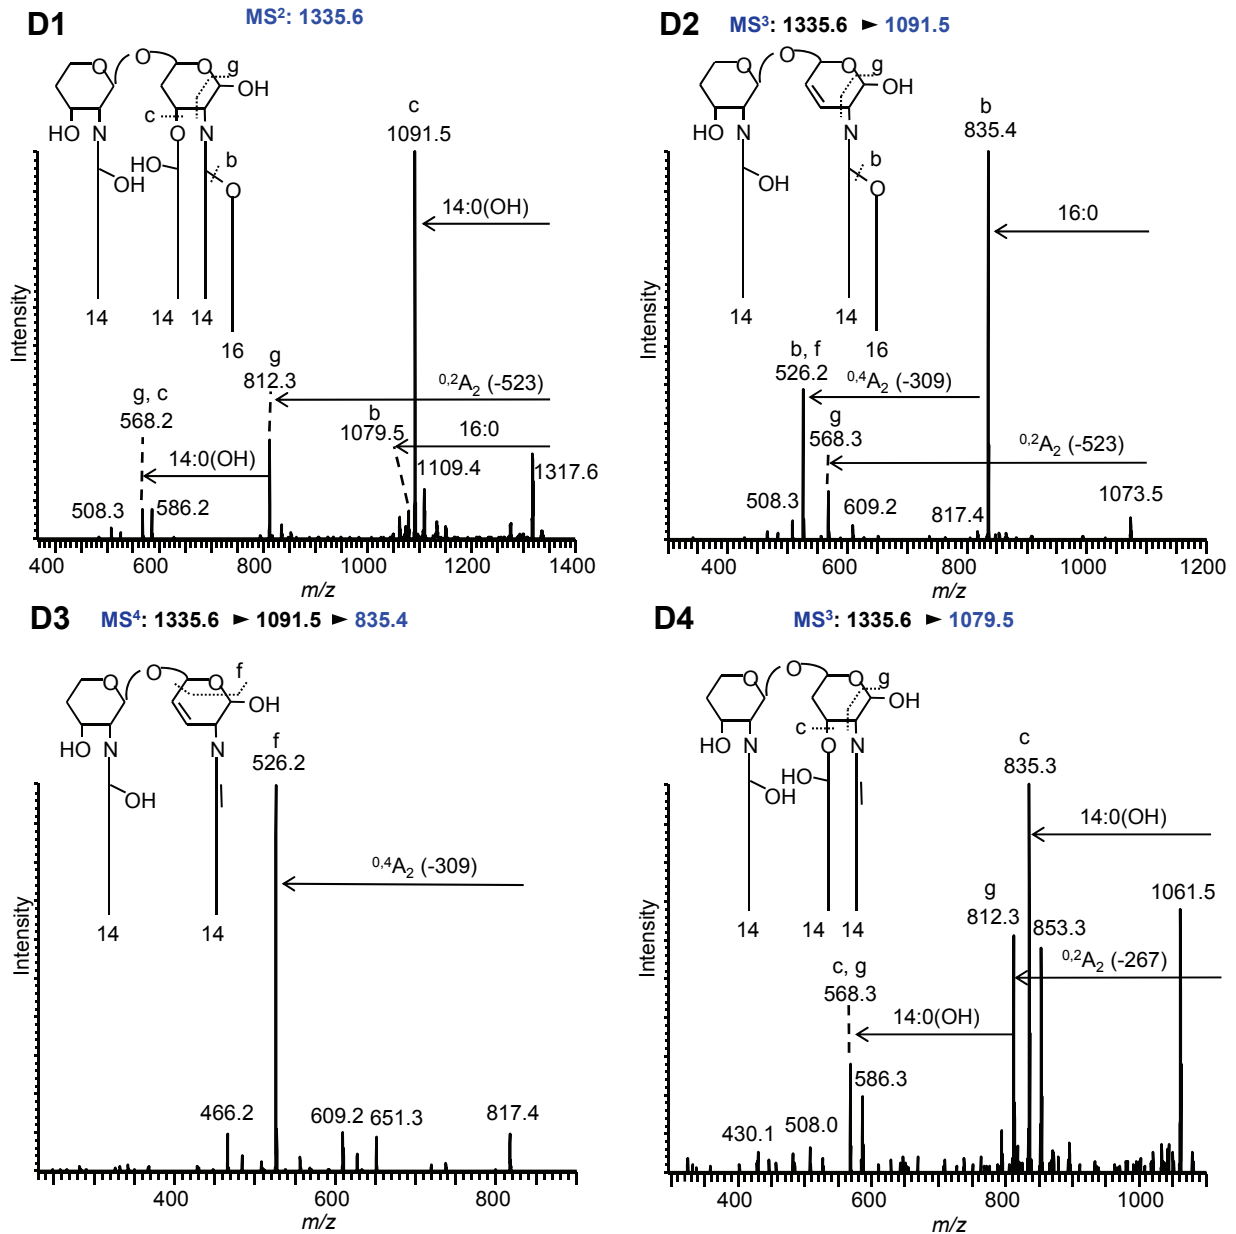

**Supplementary Figure S9-D:** Negative-ion MALDI-MS<sup>n</sup> spectra of tetraacyl lipid A from *E. coli* mutant strain MLK217 (*lpxL*) grown at 42°C. MS<sup>n</sup> spectra of tetraacyl lipid A species at *m/z* 1335.7 [3x 14:0(3-OH), 16:0] with the palmitic acid [16:0] in 2-O-position (on the proximal glucosamine). (D1) MS<sup>2</sup> of *m/z* 1335.6; (D2) MS<sup>3</sup> of *m/z* 1091.5; (D3) MS<sup>4</sup> of *m/z* 835.4; (D4) MS<sup>3</sup> of *m/z* 1079.4.

**Supplementary Table S2: Fragmentation Pathways of *lpxL*- lipid A with different acyl substitution patterns**

| lipid A at <i>m/z</i>           | Substitutions                | <sup>0,4</sup> A <sub>2</sub> fragment loss * | MS <sup>n</sup> fragment ion, <i>m/z</i> | <sup>0,2</sup> A <sub>2</sub> fragment loss |
|---------------------------------|------------------------------|-----------------------------------------------|------------------------------------------|---------------------------------------------|
| 1559.9 ( <i>lpxL</i> -, 37 °C ) | 16:1 in 2'-O ; 2-O-H (free)  | - 327 Da                                      | 490 <sup>Z</sup>                         | - 285 Da                                    |
| 1561.9 ( <i>lpxL</i> -, 42 °C ) | 2'-O-H (free) ; 2-O- 16:0    | - 309 Da #                                    | 508 <sup>Z</sup>                         | - 523 Da <sup>W</sup>                       |
| 1769.9 ( <i>lpxL</i> -, 37 °C ) | 16:1 in 2'-O ; 2-O-H (free)  | - 327 Da                                      | 490                                      | - 285 Da                                    |
| 1771.9 ( <i>lpxL</i> -, 42 °C ) | 2'-O-H (free) ; 2-O- 16:0    | - 309 Da #                                    | 508                                      | - 523 Da <sup>W</sup>                       |
| 1553.9 ( <i>lpxL</i> -, 30 °C ) | 2'-O-H (free) ; 2-O-H (free) | - 327 Da                                      | 508                                      | - 285 Da                                    |

\* <sup>0,4</sup>A<sub>2</sub> fragmentation is observed after initial loss of fatty acid in proximal 3- position of the glucosamine

# fatty acid in secondary 2-O position was eliminated first and subsequently the acyl group in primary 2- position carries a double bond, Δ<sup>2</sup>-14:1 (after eliminating 16:0 off proximal 2-O position)

<sup>Z</sup> fragment ion as shown in Figure 8A and 8B

<sup>W</sup> <sup>0,2</sup>A<sub>2</sub> fragmentation includes combined loss of secondary 16:0 (in 2-O-position ) bound to hydroxy group of hydroxymyristic acid in 2-position, also see Figure 6.
